# Supplementary material for: Cardiotrophin 1 stimulates beneficial myogenic and vascular remodeling of the heart
Source: PubMed Central journal article supplement (PMC5630684; doi:10.1038/cr.2017.87), 2017-08-08
Supplement: cr201787x3.pdf [file cr201787x3.pdf]

24 h treatment

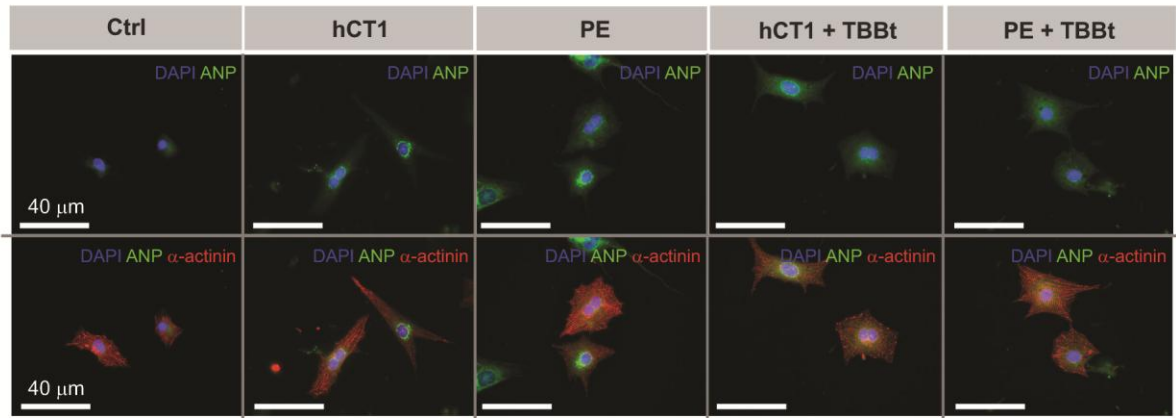

**Supplementary information, Figure S3. Casein kinase 2 (CK2) activation is required for hCT1 induced cardiomyocyte hypertrophy.** Immunocytochemistry images from Figure 3I-K. Primary rat cardiomyocytes were treated for 24 h with control serum-free medium (Ctrl), hCT1 (0.5 nM), or PE (100  $\mu$ M) in the presence or absence of the CK2 inhibitor (TBBt, 50  $\mu$ M). Immunocytochemistry was used to stain cells for:  $\alpha$ -actinin (red), the pro-hypertrophic marker atrial natriuretic peptide – ANP (green), and nuclei were stained with DAPI (blue). Scale bar, 40  $\mu$ m.
