# Supplementary material for: Cardiotrophin 1 stimulates beneficial myogenic and vascular remodeling of the heart
Source: PubMed Central journal article supplement (PMC5630684; doi:10.1038/cr.2017.87), 2017-08-08
Supplement: cr201787x4.pdf [file cr201787x4.pdf]

**A**

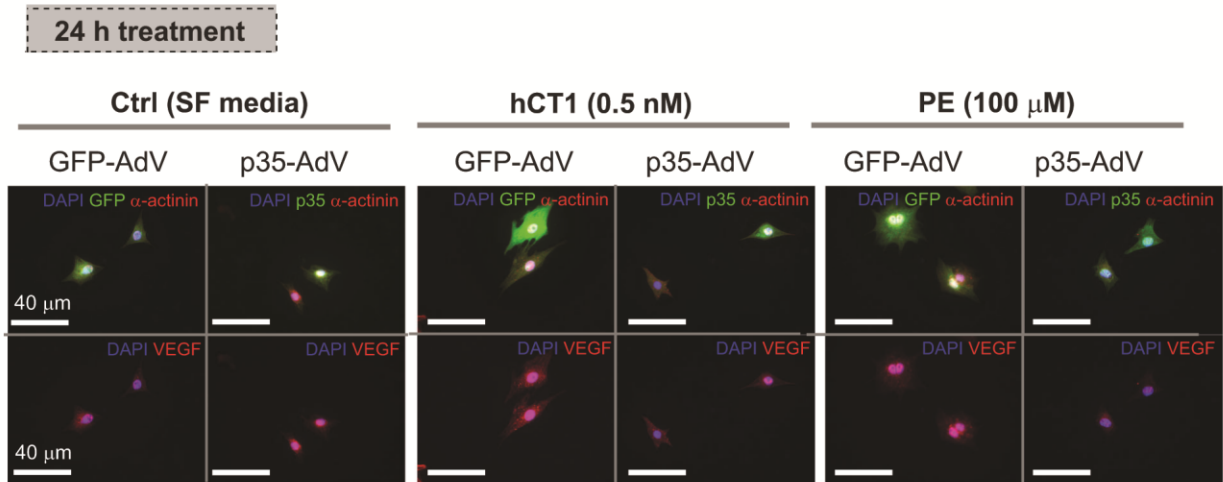

**B**

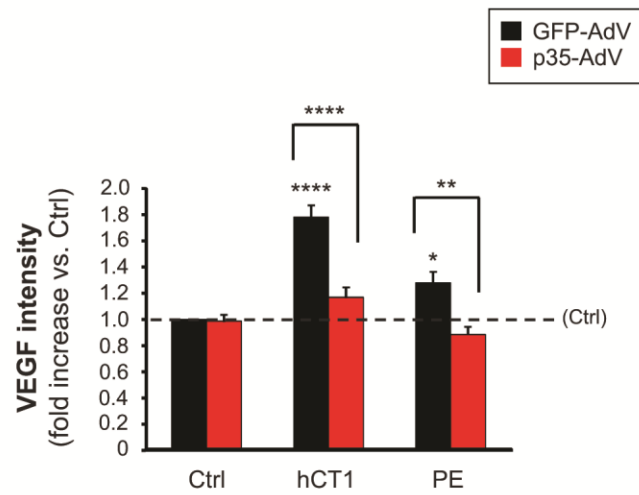

**Supplementary information, Figure S4. VEGF expression induced by hCT1 stimulation is inhibited upon blocking caspase activity.** (A) Primary rat cardiomyocytes were infected for 24 h with an adenovirus (AdV) encoding the caspase inhibitor, p35-AdV, prior to inducing hypertrophy with hCT1 or PE for 24 h. Serum-free medium was used as a control treatment (SF, Ctrl) and GFP-AdV was used as a control AdV infection. Both p35-AdV and GFP-AdV were used at a Mean of Infectivity (MOI) of 20. Immunocytochemistry was used to stain cells for:  $\alpha$ -actinin (far-red), VEGF (red), and nuclei were stained with DAPI (blue). The GFP reporter identified the positively infected cardiomyocytes (green). Scale bar, 40  $\mu$ m. (B) Compared to control, a significant increase in VEGF expression was observed with hCT1 stimulation whereas a modest increase in VEGF was observed with PE treatment after 24 h (n=3; \*\*\*\*P<0.0001 and \*P<0.05). In addition, p35-AdV significantly inhibited the hCT1 and PE induced increase in VEGF expression (n=3; \*\*\*\*P<0.0001 and \*\*P<0.01, respectively).
