# Supplementary material for: Cardiotrophin 1 stimulates beneficial myogenic and vascular remodeling of the heart
Source: PubMed Central journal article supplement (PMC5630684; doi:10.1038/cr.2017.87), 2017-08-08
Supplement: cr201787x6.pdf [file cr201787x6.pdf]

**A**

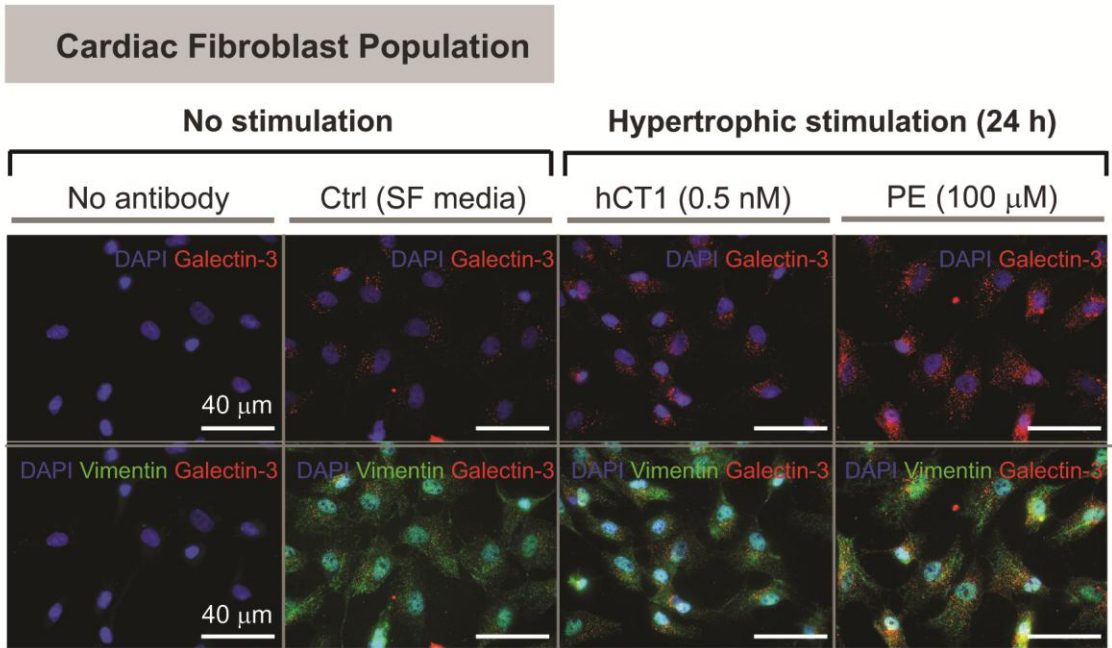

**B**

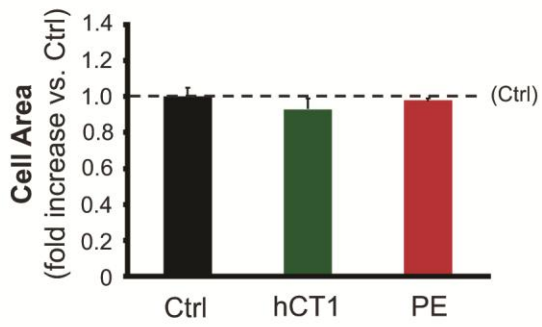

**C**

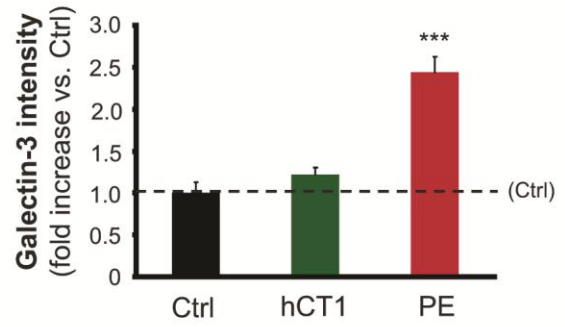

**Supplementary information, Figure S6. hCT1 stimulation of cardiac fibroblasts does not significantly induce expression of the pro-fibrotic marker Galectin-3.** (A) The cardiac fibroblast population of cells (derived from the pre-plating step of the primary cardiomyocyte isolation procedure) were incubated with control serum-free medium (Ctrl, SF medium), hCT1 (0.5 nM), or PE (100  $\mu$ M) for 24 h. Immunofluorescence was used to detect the cardiac fibroblast marker Vimentin (green), the pro-fibrotic marker Galectin-3 (red), and nuclei were stained with DAPI (blue). The control without primary antibody is devoid of non-specific staining. Scale bar, 40  $\mu$ m. (B-C) Pathologic stimulation with PE resulted in a significant increase in the expression of Galectin-3 versus control (n=3; \*\*\*P<0.001) whereas hCT1 did not significantly enhance pro-fibrotic Galectin-3 expression versus non-stimulated control cells. Cell area of cardiac fibroblasts was not significantly changed with hCT1 or PE treatments when compared to control.
