# Supplementary material for: Cardiotrophin 1 stimulates beneficial myogenic and vascular remodeling of the heart
Source: PubMed Central journal article supplement (PMC5630684; doi:10.1038/cr.2017.87), 2017-08-08
Supplement: cr201787x7.pdf [file cr201787x7.pdf]

**A**

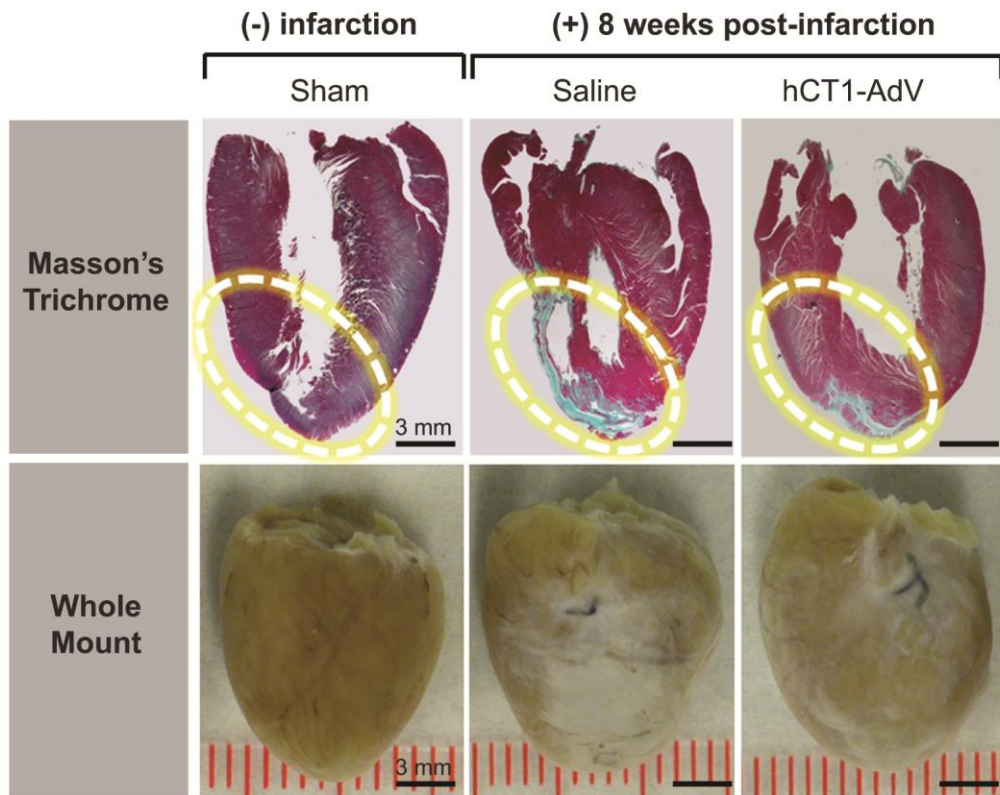

**B**

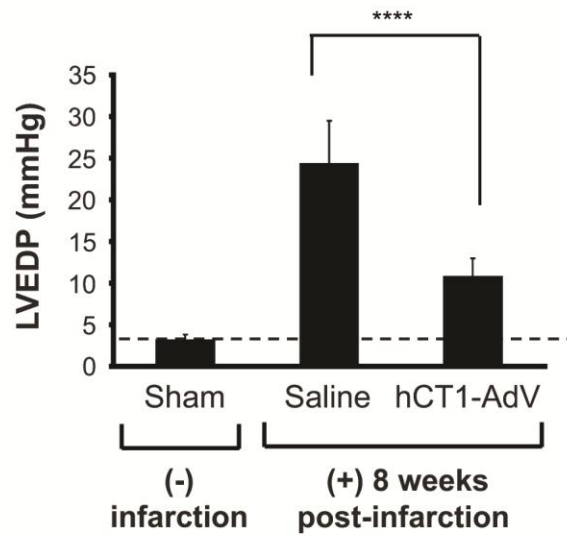

**Supplementary information, Figure S7. hCT1 attenuates the effects observed upon inducing myocardial infarction (MI) by ligation of the Left Anterior Descending (LAD) coronary artery.** (A) Rats were subjected to LAD ligation surgery followed by intracardiac injection of hCT1 Adenovirus (hCT1-AdV at  $7.5 \times 10^5$  infectious particles per gram body weight) or of saline. A separate group of control animals were sham operated (open cavity, no LAD). Animals were given a booster injection at 2 weeks following surgery. At 8 weeks post-MI, the left ventricle end-diastolic pressure (LVEDP) was measured using a 2F high-fidelity micro-manometer catheter (Millar Institute). Rats were then euthanized and whole hearts fixed in 10% formalin for immunohistologic analysis. Cross-sections (5-8  $\mu\text{m}$ ) were stained with Masson's Trichrome to visualize fibrosis in the infarct area. A significant decrease in fibrosis/collagen deposition was observed in the hCT1-treated animals versus saline as visualized by Whole mount (white-coloured scar tissue) and Masson's Trichrome (blue-coloured scar tissue). Scale bar, 3 mm. (B) A significant improvement in hemodynamic cardiac function and ventricular performance was noted as there was a significant decrease in LVEDP in the hCT1 treated animals versus saline (n=5, \*\*\*\*P<0.0001).
