# Supplementary material for: Cardiotrophin 1 stimulates beneficial myogenic and vascular remodeling of the heart
Source: PubMed Central journal article supplement (PMC5630684; doi:10.1038/cr.2017.87), 2017-08-08
Supplement: cr201787x8.pdf [file cr201787x8.pdf]

| Gene name                                                     | Gene symbol                                                  | Accession #  | Fold change (vs. Ctrl) * |      |
|---------------------------------------------------------------|--------------------------------------------------------------|--------------|--------------------------|------|
| <b>Angiogenesis &amp; Endothelial Growth/Survival Factors</b> |                                                              |              |                          |      |
| Angiopoietin-like 4                                           | Angptl4                                                      | NM_199115    | 2.71                     |      |
| Fms-related tyrosine kinase 4                                 | Flt4                                                         | NM_053652    | 2.26                     |      |
| Von Willebrand factor 5A                                      | Vwa5a                                                        | NM_198755    | 2.03                     |      |
| Vascular Endothelial Growth Factor A                          | Vegfa                                                        | NM_031836    | 1.14                     |      |
| <b>Antimicrobial Peptides</b>                                 |                                                              |              |                          |      |
| Regenerating islet-derived 3 gamma                            | Reg3g                                                        | NM_173097    | 28.39                    |      |
| Regenerating islet-derived 1 alpha                            | Reg1a                                                        | NM_012641    | 7.96                     |      |
| Regenerating islet-derived 3 beta                             | Reg3b                                                        | NM_053289    | 6.14                     |      |
| Hepcidin Antimicrobial Peptide                                | Hamp                                                         | NM_053469    | 2.70                     |      |
| <b>Pro-survival Receptors</b>                                 |                                                              |              |                          |      |
| Phosphoinositide-3-kinase, subunit 1, alpha                   | Pik3r1                                                       | NM_013005    | 1.56                     |      |
| Phosphoinositide-3-kinase, subunit 6                          | Pik3r6                                                       | NM_001081444 | 1.49                     |      |
| <b>Interferons</b>                                            |                                                              |              |                          |      |
| Immunity-related GTPase family, M                             | Irgm                                                         | NM_001012007 | 0.78                     |      |
| Interferon gamma                                              | Ifng                                                         | NM_138880    | n.s.                     |      |
| Interferon regulatory factor 7                                | Irf7                                                         | NM_001033691 | 0.55                     |      |
| Interferon-induced protein 44                                 | Ifi44                                                        | NM_001107729 | 0.64                     |      |
| Interferon-induced protein 35                                 | Ifi35                                                        | NM_001009625 | 0.70                     |      |
| Interferon, alpha-inducible protein 27 like 2B                | Ifi27l2b                                                     | NM_206846    | 0.66                     |      |
| Interferon beta 1                                             | Ifnb1                                                        | NM_019127    | n.s.                     |      |
| Interferon stimulated exonuclease gene 20                     | Isg20                                                        | NM_001008510 | 0.76                     |      |
| <b>Collagens</b>                                              |                                                              |              |                          |      |
| Collagen, type IV, alpha 3                                    | Col4a3                                                       | NM_001135759 | 0.65                     |      |
| Collagen, type IV, alpha 1                                    | Col4a1                                                       | NM_001135009 | 0.88                     |      |
| Collagen, type IV, alpha 4                                    | Col4a4                                                       | NM_001008332 | 0.74                     |      |
| Collagen, type VIII, alpha 1                                  | Col8a1                                                       | NM_001107100 | 0.86                     |      |
| <b>Anti-oxidants</b>                                          |                                                              |              |                          |      |
| Superoxide dismutase 2, mitochondrial                         | Sod2                                                         | NM_017051    | 1.27                     |      |
| Metallothionein 2A                                            | Mt2A                                                         | NM_001137564 | 1.98                     |      |
| <b>Mitochondrial Energy Metabolism (Complexes I-V)</b>        |                                                              |              |                          |      |
| I                                                             | NADH dehydrogenase (ubiquinone) 1 alpha subcomplex, 1        | Ndufa1       | NM_001108813             | 0.75 |
|                                                               | NADH dehydrogenase (ubiquinone) 1 alpha subcomplex, 2        | Ndufa2       | NM_001106153             | 0.74 |
|                                                               | NADH dehydrogenase (ubiquinone) 1 alpha subcomplex 5         | Ndufa5       | NM_012985                | 0.79 |
|                                                               | NADH dehydrogenase (ubiquinone) 1 alpha subcomplex, 8        | Ndufa8       | NM_001047862             | 0.82 |
|                                                               | NADH dehydrogenase (ubiquinone) 1 alpha subcomplex 10        | Ndufa10      | NM_199495                | 0.77 |
| II                                                            | Succinate dehydrogenase complex, subunit B, iron sulfur (lp) | Sdhb         | NM_001100539             | 0.77 |
|                                                               | Succinate dehydrogenase complex, subunit D, integral protein | Sdhd         | NM_198788                | 0.88 |
| III                                                           | Cytochrome c-1                                               | Cyc1         | NM_001130491             | 0.89 |
|                                                               | Ubiquinol-cytochrome c reductase core protein I              | Uqcrc1       | NM_001004250             | 0.88 |
|                                                               | Ubiquinol-cytochrome c reductase, complex III subunit VII    | Uqcrcq       | NM_001025134             | 0.81 |
|                                                               | Ubiquinol-cytochrome c reductase, complex III subunit XI     | Uqcrc11      | NM_001126097             | 0.85 |
| IV                                                            | Cytochrome c oxidase subunit IV isoform 1                    | Cox4i1       | NM_017202                | 0.82 |
|                                                               | Cytochrome c oxidase subunit VIIIb                           | Cox7b        | NM_182819                | 0.79 |
|                                                               | Cytochrome c oxidase, subunit VIIc                           | Cox7c        | NM_001134705             | 0.86 |
|                                                               | Cytochrome c oxidase, subunit VIIIb                          | Cox8b        | NM_012786                | 0.56 |
| V                                                             | ATP synthase, mitochondrial F1 complex, alpha 1, cardiac     | Atp5a1       | NM_023093                | 0.85 |
|                                                               | ATP synthase, mitochondrial F1 complex, epsilon              | Atp5e        | NM_139099                | 0.87 |
|                                                               | ATP synthase, mitochondrial Fo complex, subunit E            | Atp5i        | NM_080481                | 0.73 |
|                                                               | ATP synthase, mitochondrial Fo complex, subunit F6           | Atp5j        | NM_053602                | 0.82 |

**Supplementary information, Table S1. Microarray analysis of hCT1 stimulated primary cardiomyocytes.** Primary cardiomyocytes were stimulated with hCT1 (0.5 nM) for 24 h followed by isolation of total RNA which was then subjected to expression profiling analysis by Microarray (Affymetrix Rat GeneChip 1.0ST). Serum-free medium was used as a control (Ctrl). Significant differences in gene expression were observed when compared to control (n=3; \*P<0.05) while some genes had no significant difference (n.s.) in gene expression. Some of the protein family groups of target genes activated were: angiogenesis and endothelial growth/survival factors, antimicrobial peptides, pro-survival receptors, and anti-oxidants. Some of the target genes families that decreased were: collagens, interferons, and mitochondrial energy metabolism.
